# Supplementary material for: Comprehensive Analysis of Transcriptome and Metabolome Elucidates the Molecular Regulatory Mechanism of Salt Resistance in Roots of Achnatherum inebrians Mediated by Epichloë gansuensis
Source: MDPI journal article supplement (doi:10.3390/jof8101092), 2022-10-17
Supplement: s1 [file s1]

Supplement Data

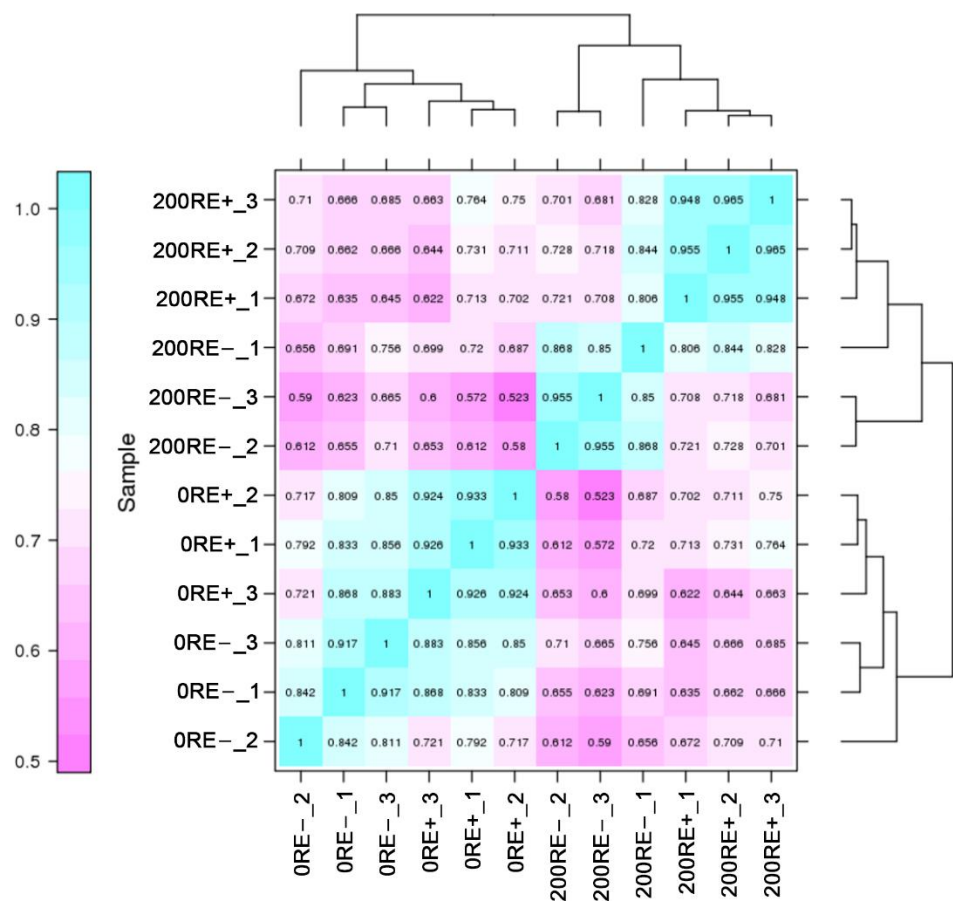

**Supplement Figure S1.** Heat map matrix showing the Pearson correlation among samples. Color bar represents the correlation coefficient ( $r^2$ ).

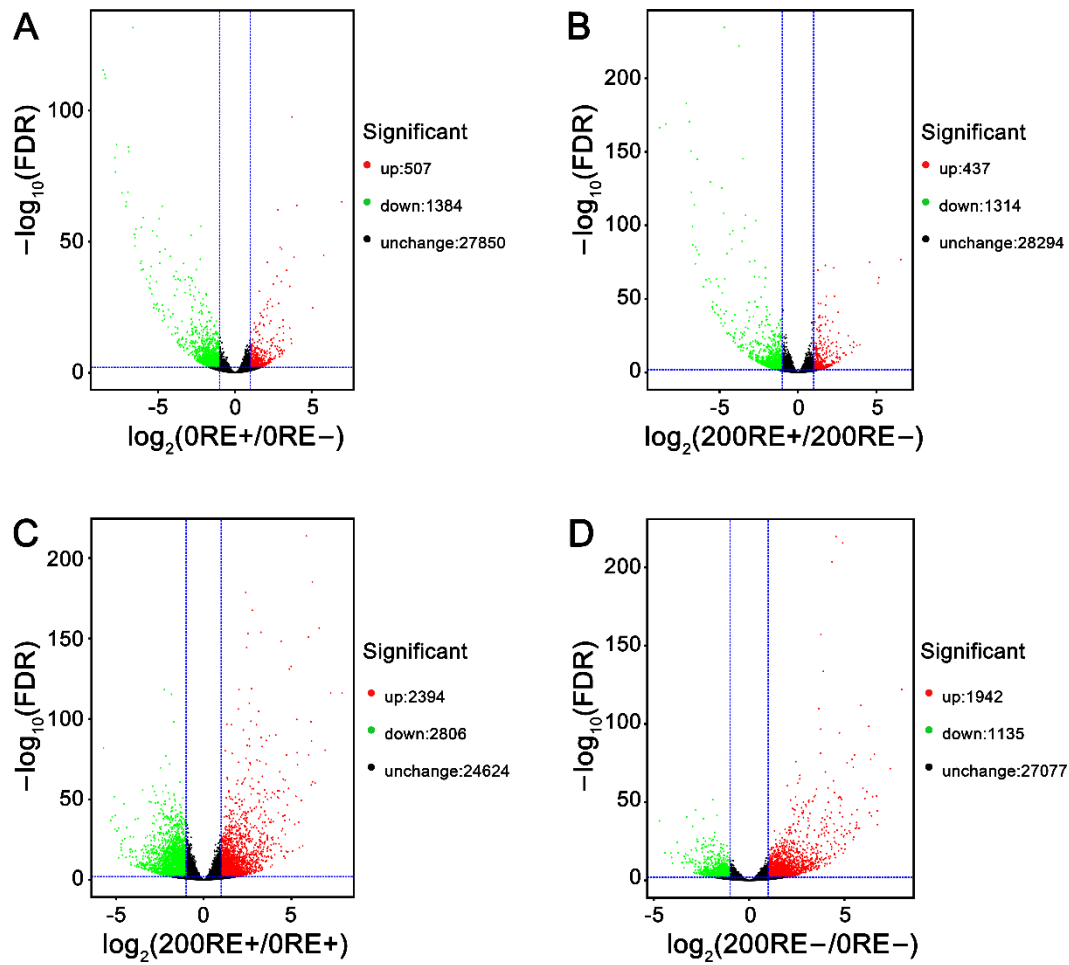

**Supplement Figure S2.** Volcano plots of differentially expressed genes for 0RE+ vs 0RE- (A), 200RE+ vs 200RE- (B), 200RE+ vs 0RE+ (C) and 200RE- vs 0RE- (D). The data for all identified genes are plotted as  $\log_2(\text{fold change})$  versus the  $-\log_{10}(\text{FDR})$ . Red dots represent the up-regulated DEGs, green dots represent the down-regulated DEGs, and black dots represent the genes with unchanged expression.

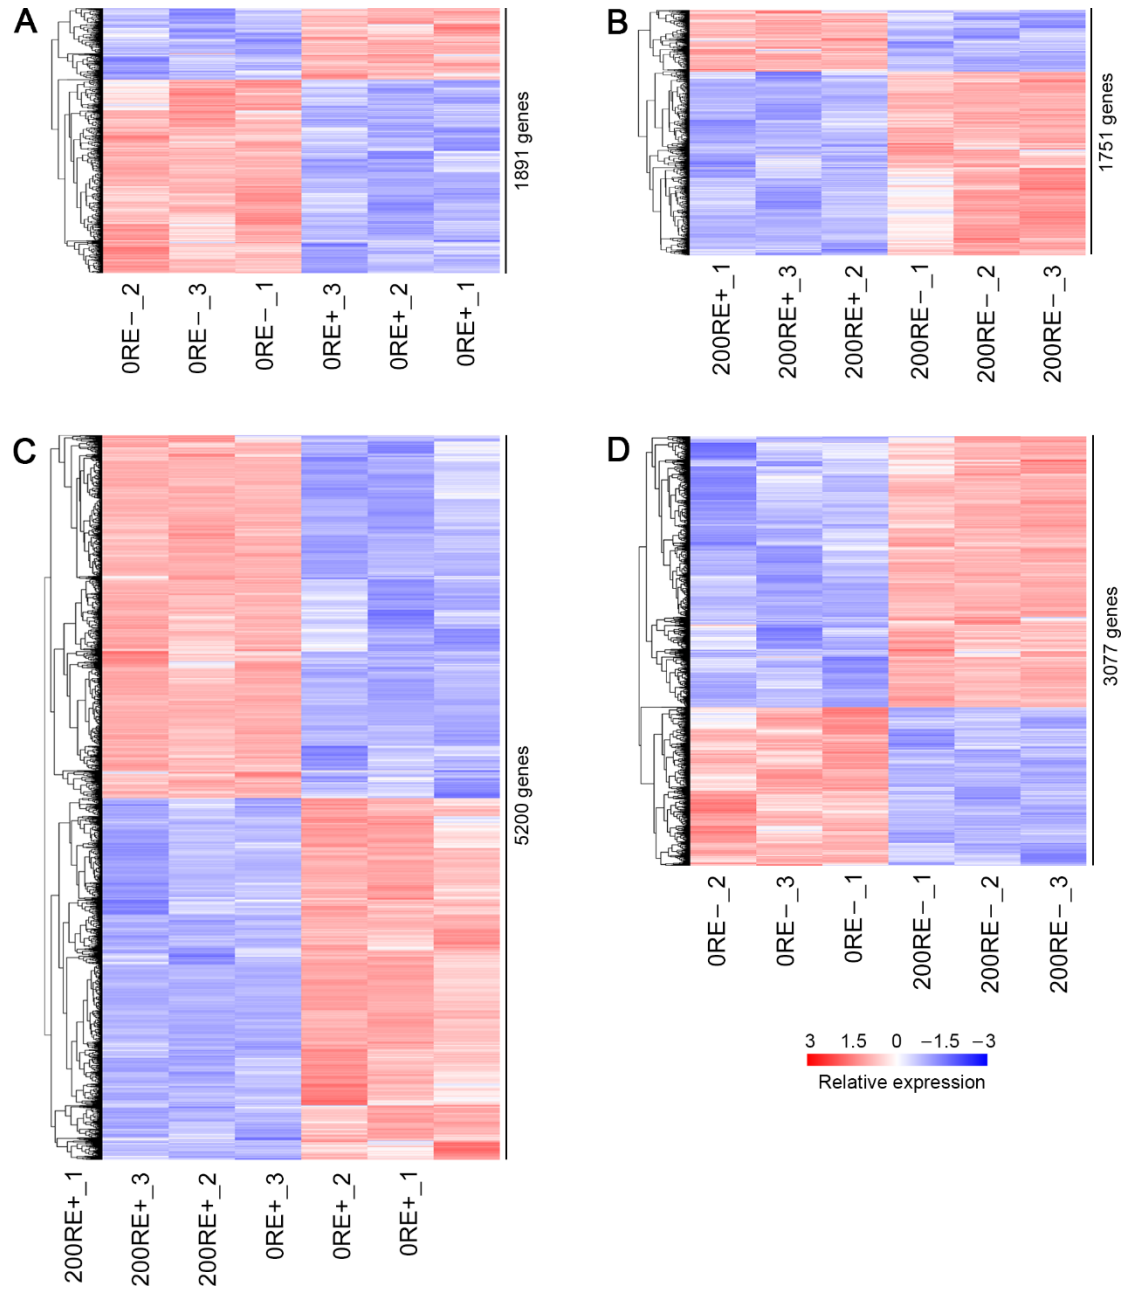

**Supplement Figure S3:** Heatmap exhibits hierarchical clustering of differentially expressed genes (DEGs) identified in comparative groups of "0RE+ vs 0RE-" (A), "200RE+ vs 200RE-" (B), "200RE+ vs 0RE+" (C), and "0RE- vs 200RE-" (D). Values are row-scaled to show relative expression. Blue and red represent low and high levels respectively. The relative expression is calculated using formula  $\log_2(\text{fold-change})$ .

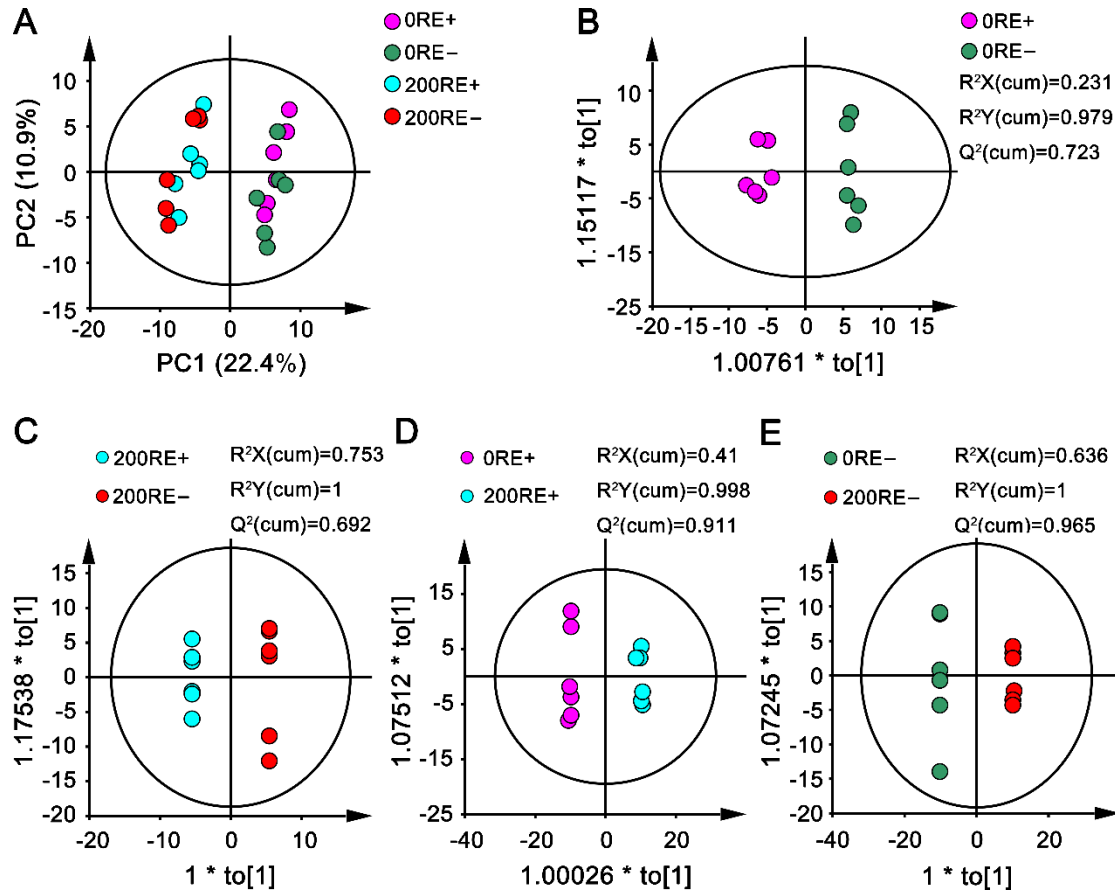

**Supplement Figure S4.** The principal component analysis (PCA) for metabolic profiles of roots of E+ and E- plants under 0 mM and 200 mM NaCl concentration (A). And the score plots of orthogonal partial least squares discriminant analysis (OPLS-DA) exhibited the endophyte-dependent metabolite difference between RE+ and RE- under NaCl-free condition (B), between RE+ and RE- under 200 mM NaCl concentration; and the NaCl dose-dependent metabolite difference between 200 mM and 0 mM NaCl in RE+ (D), between 200 mM and 0 mM NaCl in RE- (E).

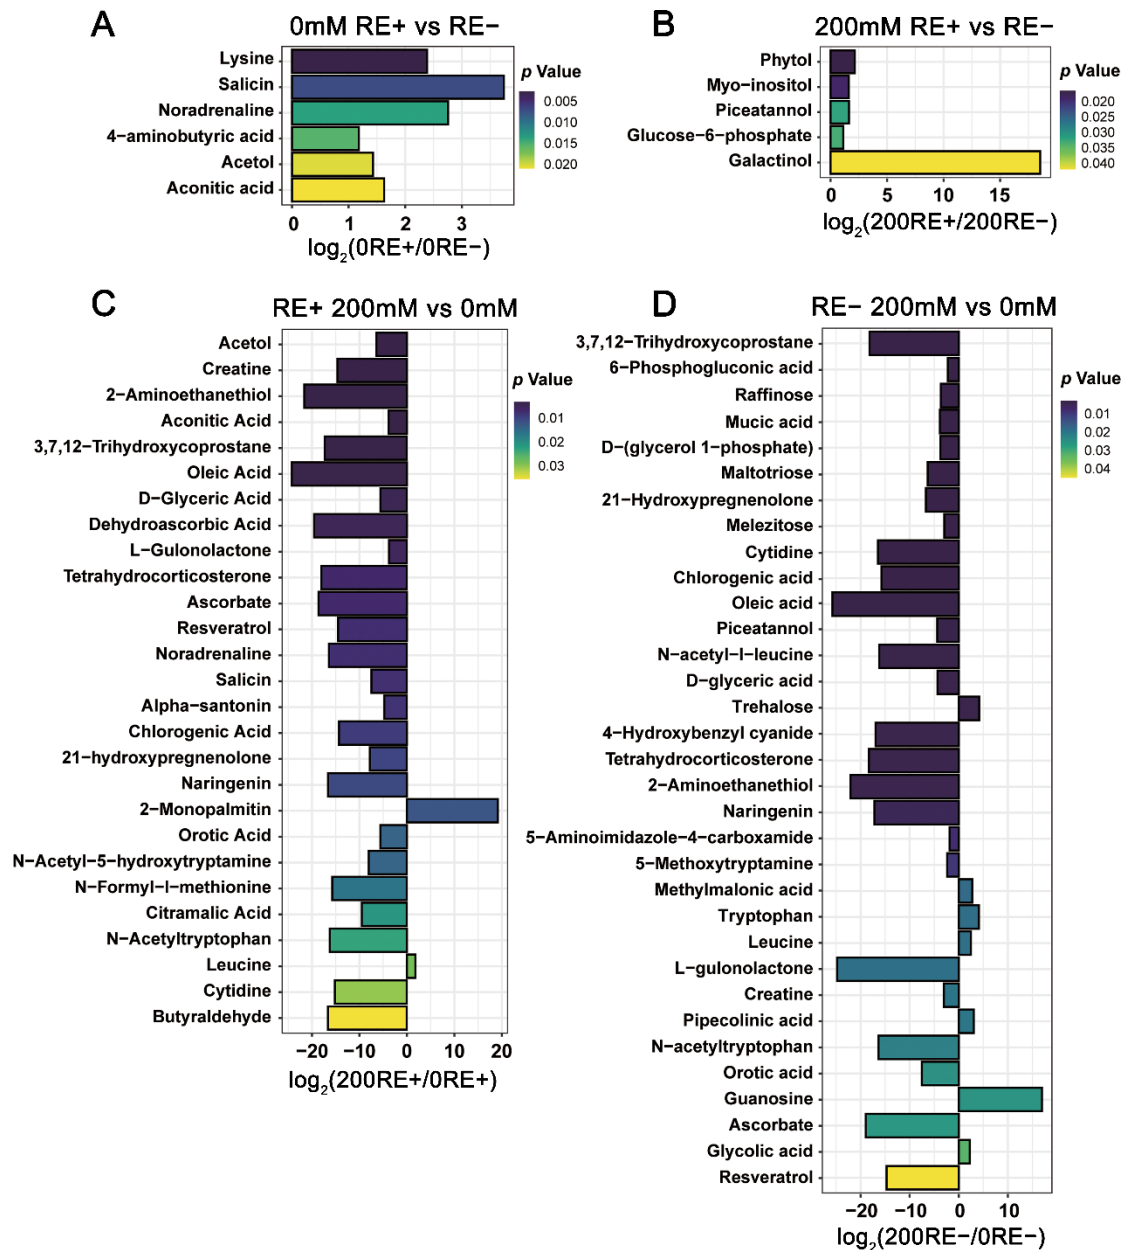

**Supplement Figure S5.** Histogram with fold changes and  $p$ -value showed the significantly different metabolites between RE+ and RE- at 0 mM (A) and 200 mM NaCl concentration (B); and between 200 mM and 0 mM NaCl treatment in RE+ (C) and RE- (D). Fold changes were evaluated with the formula  $\log_2(RE+/RE-)$  and  $\log_2(200\text{ mM}/0\text{ mM})$ .

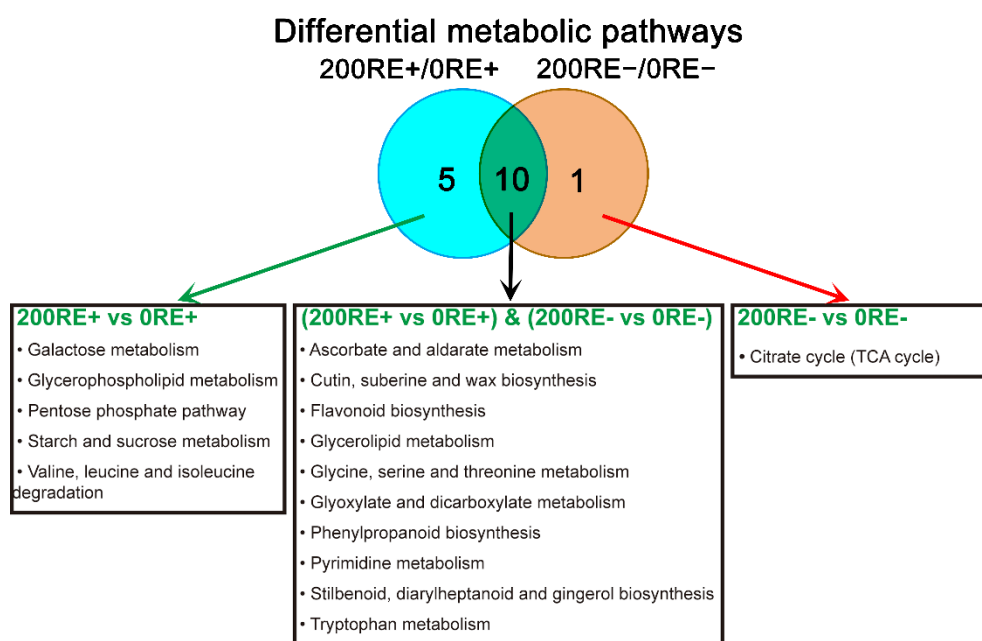

**Supplement Figure S6.** Venn diagram analysis of differential metabolic pathways identified between 200 mM and 0 mM NaCl concentration in roots of E+ and E- plants. The overlapping region represents pathways shared in the two comparative groups, and the remaining regions indicate differential pathways in the corresponding groups.

**Supplement Table S1.** Statistical table of Illumina sequencing output and alignment results between sample sequencing data and PacBio data.

| Samples  | Clean reads | % ≥ Q30 | Total reads | Mapped reads           |
|----------|-------------|---------|-------------|------------------------|
| 0RE+_1   | 21,856,136  | 94.55%  | 43,712,272  | 31,699,873<br>(72.52%) |
| 0RE+_2   | 21,358,666  | 94.42%  | 42,717,332  | 32,429,373<br>(75.92%) |
| 0RE+_3   | 22,432,593  | 94.45%  | 44,865,186  | 35,042,735<br>(78.11%) |
| 0RE-_1   | 19,085,883  | 94.28%  | 38,171,766  | 28,704,388<br>(75.20%) |
| 0RE-_2   | 22,272,858  | 94.95%  | 44,545,716  | 30,790,736<br>(69.12%) |
| 0RE-_3   | 19,230,555  | 94.71%  | 38,461,110  | 29,868,599<br>(77.66%) |
| 200RE+_1 | 21,881,327  | 94.40%  | 43,762,654  | 32,996,379<br>(75.40%) |
| 200RE+_2 | 22,296,357  | 94.71%  | 44,592,714  | 33,634,593<br>(75.43%) |
| 200RE+_3 | 22,225,156  | 94.55%  | 44,450,312  | 33,475,300<br>(75.31%) |
| 200RE-_1 | 22,602,966  | 94.24%  | 45,205,932  | 34,189,903             |

|          |            |        |            |            |
|----------|------------|--------|------------|------------|
|          |            |        |            | (75.63%)   |
| 200RE-_2 | 21,652,720 | 94.66% | 43,305,440 | 33,097,162 |
|          |            |        |            | (76.43%)   |
| 200RE-_3 | 22,119,123 | 94.25% | 44,238,246 | 33,588,583 |
|          |            |        |            | (75.93%)   |

**Supplement Table S2.** Concentrations with mean  $\pm$  SE, fold changes, *p*-value for significantly changed metabolites identified between E+ and E- plants under 0 and 200 mM NaCl treatment.

| Metabolite names    | Relative concentration under               |                                           | Fold Changes                     | <i>p</i> -value |
|---------------------|--------------------------------------------|-------------------------------------------|----------------------------------|-----------------|
|                     | 0 mM NaCl treatment                        |                                           |                                  |                 |
|                     | RE+                                        | RE−                                       | Log <sub>2</sub> (0RE+/0RE−)     |                 |
| Lysine              | 0.129853±0.011318                          | 0.024867±0.003721                         | 2.38                             | 0.004869        |
| Salicin             | 0.3731±0.042647                            | 0.027922±0.007228                         | 3.74                             | 0.008605        |
| Noradrenaline       | 0.001863±0.000212                          | 0.000276±0.000052                         | 2.76                             | 0.014194        |
| 4-aminobutyric acid | 3.310951±0.189899                          | 1.461069±0.177237                         | 1.18                             | 0.015635        |
| Acetol              | 0.015531±0.000675                          | 0.005762±0.001272                         | 1.43                             | 0.019795        |
| Aconitic acid       | 0.014051±0.000888                          | 0.004556±0.001093                         | 1.62                             | 0.020399        |
|                     | Relative concentration under               |                                           | Fold Changes                     |                 |
|                     | 200 mM NaCl treatment                      |                                           |                                  |                 |
|                     | RE+                                        | RE−                                       | Log <sub>2</sub> (200RE+/200RE−) |                 |
| Phytol              | 0.034894±0.003594                          | 0.007928±0.00112                          | 2.14                             | 0.015186        |
| myo-Inositol        | 0.355494±0.03257                           | 0.116332±0.010909                         | 1.61                             | 0.017471        |
| Piceatannol         | 0.00854±0.000875                           | 0.00276±0.000339                          | 1.63                             | 0.030683        |
| Glucose-6-phosphate | 0.005946±0.000273                          | 0.002725±0.000452                         | 1.13                             | 0.031895        |
| Galactinol          | 0.004992±0.000867                          | 1.3e <sup>-08</sup> ±8.94e <sup>-10</sup> | 18.55                            | 0.040667        |
|                     | Relative concentration in roots of         |                                           | Fold Changes                     |                 |
|                     | E+ plants                                  |                                           |                                  |                 |
|                     | 200 mM NaCl treatment                      | 0 mM NaCl treatment                       | Log <sub>2</sub> (200RE+/0RE+)   |                 |
| Acetol              | 0.000179±4.71e <sup>-05</sup>              | 0.015531±0.000675                         | -6.44                            | 0.000003        |
| Creatine            | 2.11e <sup>-08</sup> ±2.59e <sup>-09</sup> | 0.00054±0.00003                           | -14.64                           | 0.000023        |

|                              |                                            |                                            |        |          |
|------------------------------|--------------------------------------------|--------------------------------------------|--------|----------|
| 2-Aminoethanethiol           | 2.11e <sup>-08</sup> ±2.59e <sup>-09</sup> | 0.068416±0.004619                          | -21.63 | 0.000124 |
| Aconitic acid                | 0.000976±0.000231                          | 0.014051±0.000888                          | -3.85  | 0.000169 |
| 3,7,12-Trihydroxycoprostan   | 2.11e <sup>-08</sup> ±2.59e <sup>-09</sup> | 0.00351±0.000257                           | -17.34 | 0.000234 |
| Oleic acid                   | 2.11e <sup>-08</sup> ±2.59e <sup>-09</sup> | 0.420317±0.033439                          | -24.25 | 0.000443 |
| D-Glyceric acid              | 0.012382±0.002852                          | 0.586753±0.055516                          | -5.57  | 0.001777 |
| Dehydroascorbic acid         | 2.11e <sup>-08</sup> ±2.59e <sup>-09</sup> | 0.016171±0.001607                          | -19.55 | 0.002116 |
| L-Gulonolactone              | 0.041999±0.017145                          | 0.573466±0.051886                          | -3.77  | 0.002641 |
| Tetrahydrocorticosterone     | 2.11e <sup>-08</sup> ±2.59e <sup>-09</sup> | 0.005606±0.000621                          | -18.02 | 0.004225 |
| Ascorbate                    | 2.11e <sup>-08</sup> ±2.59e <sup>-09</sup> | 0.008485±0.000944                          | -18.62 | 0.00432  |
| Resveratrol                  | 2.11e <sup>-08</sup> ±2.59e <sup>-09</sup> | 0.000487±0.000055                          | -14.49 | 0.004916 |
| Noradrenaline                | 2.11e <sup>-08</sup> ±2.59e <sup>-09</sup> | 0.001863±0.000212                          | -16.43 | 0.005001 |
| Salicin                      | 0.002076±0.000847                          | 0.3731±0.042647                            | -7.49  | 0.005259 |
| alpha-Santonin               | 0.000305±0.000124                          | 0.008215±0.000916                          | -4.75  | 0.005781 |
| Chlorogenic acid             | 0.000014±3.06e <sup>-06</sup>              | 0.291122±0.035095                          | -14.31 | 0.006928 |
| 21-Hydroxypregnenolone       | 0.000633±9.14e <sup>-05</sup>              | 0.142092±0.017636                          | -7.81  | 0.008366 |
| Naringenin                   | 2.11e <sup>-08</sup> ±2.59e <sup>-09</sup> | 0.002124±0.000269                          | -16.62 | 0.009021 |
| 2-Monopalmitin               | 0.004493±0.000586                          | 7.71e <sup>-09</sup> ±2.43e <sup>-10</sup> | 19.15  | 0.010786 |
| Orotic acid                  | 0.000016±6.63e <sup>-06</sup>              | 0.000784±0.000104                          | -5.59  | 0.013075 |
| N-acetyl-5-hydroxytryptamine | 0.000007±1.92e <sup>-06</sup>              | 0.001974±0.000267                          | -8.05  | 0.013274 |
| N-formyl-L-methionine        | 2.11e <sup>-08</sup> ±2.59e <sup>-09</sup> | 0.001159±0.000163                          | -15.74 | 0.015617 |
| Citramalic acid              | 0.000008±3.16e <sup>-06</sup>              | 0.005643±0.000846                          | -9.51  | 0.021577 |
| N-acetyltryptophan           | 2.11e <sup>-08</sup> ±2.59e <sup>-09</sup> | 0.001637±0.000251                          | -16.24 | 0.023979 |
| Leucine                      | 0.62433±0.058184                           | 0.180196±0.042858                          | 1.79   | 0.030963 |
| Cytidine                     | 2.11e <sup>-08</sup> ±2.59e <sup>-09</sup> | 0.000784±0.000129                          | -15.18 | 0.032947 |
| Butyraldehyde                | 2.11e <sup>-08</sup> ±2.59e <sup>-09</sup> | 0.002167±0.000373                          | -16.65 | 0.039139 |

| Relative concentration in roots of |      | Fold Changes                   |
|------------------------------------|------|--------------------------------|
| E- plants                          |      |                                |
| 200 mM                             | 0 mM | Log <sub>2</sub> (200RE-/0RE-) |



|                                | NaCl treatment                             | NaCl treatment         |        |                      |
|--------------------------------|--------------------------------------------|------------------------|--------|----------------------|
| 3,7,12-Trihydroxycoprostan     | $1.3\text{e}^{-08}\pm 2.17\text{e}^{-09}$  | $0.003893\pm 0.000649$ | -18.19 | $1.59\text{e}^{-06}$ |
| 6-Phosphogluconic acid         | $0.000564\pm 0.000094$                     | $0.002626\pm 0.000438$ | -2.22  | $8.41\text{e}^{-06}$ |
| Raffinose                      | $0.015498\pm 0.002583$                     | $0.196301\pm 0.032717$ | -3.66  | $1.06\text{e}^{-05}$ |
| Mucic acid                     | $0.000609\pm 0.000101$                     | $0.008638\pm 0.00144$  | -3.83  | $1.07\text{e}^{-05}$ |
| D-(glycerol 1-phosphate)       | $0.005559\pm 0.000926$                     | $0.075165\pm 0.012528$ | -3.76  | $1.40\text{e}^{-05}$ |
| Maltotriose                    | $0.000581\pm 0.000097$                     | $0.046896\pm 0.007816$ | -6.34  | $1.48\text{e}^{-05}$ |
| 21-Hydroxypregnenolone         | $0.001093\pm 0.000182$                     | $0.113922\pm 0.018987$ | -6.7   | $2.20\text{e}^{-05}$ |
| Melezitose                     | $0.001667\pm 0.000278$                     | $0.012948\pm 0.002158$ | -2.96  | $2.81\text{e}^{-05}$ |
| Cytidine                       | $1.3\text{e}^{-08}\pm 2.17\text{e}^{-09}$  | $0.00118\pm 0.000197$  | -16.47 | $4.89\text{e}^{-05}$ |
| Chlorogenic acid               | $5.78\text{e}^{-06}\pm 9.64\text{e}^{-07}$ | $0.313605\pm 0.052267$ | -15.73 | $7.87\text{e}^{-05}$ |
| Oleic acid                     | $1.3\text{e}^{-08}\pm 2.17\text{e}^{-09}$  | $0.73529\pm 0.122548$  | -25.75 | 0.000271             |
| Piceatannol                    | $0.00276\pm 0.00046$                       | $0.057824\pm 0.009637$ | -4.39  | 0.000552             |
| N-acetyl-L-leucine             | $1.3\text{e}^{-08}\pm 2.17\text{e}^{-09}$  | $0.000974\pm 0.000162$ | -16.19 | 0.000571             |
| D-Glyceric acid                | $0.013995\pm 0.002332$                     | $0.282373\pm 0.047062$ | -4.33  | 0.000863             |
| Trehalose                      | $0.252023\pm 0.042004$                     | $0.014102\pm 0.00235$  | 4.16   | 0.000878             |
| 4-Hydroxybenzyl cyanide        | $1.3\text{e}^{-08}\pm 2.17\text{e}^{-09}$  | $0.001615\pm 0.000269$ | -16.92 | 0.001012             |
| Tetrahydrocorticosterone       | $1.3\text{e}^{-08}\pm 2.17\text{e}^{-09}$  | $0.004153\pm 0.000692$ | -18.28 | 0.001103             |
| 2-aminoethanethiol             | $1.3\text{e}^{-08}\pm 2.17\text{e}^{-09}$  | $0.056668\pm 0.009445$ | -22.05 | 0.001292             |
| Naringenin                     | $1.3\text{e}^{-08}\pm 2.17\text{e}^{-09}$  | $0.001932\pm 0.000322$ | -17.18 | 0.002543             |
| 5-Aminoimidazole-4-carboxamide | $0.000154\pm 0.000026$                     | $0.000564\pm 0.000094$ | -1.87  | 0.006041             |
| 5-Methoxytryptamine            | $0.001899\pm 0.000316$                     | $0.009796\pm 0.001633$ | -2.37  | 0.007805             |
| Methylmalonic acid             | $0.030638\pm 0.005106$                     | $0.004567\pm 0.000761$ | 2.75   | 0.01791              |
| Tryptophan                     | $0.105644\pm 0.017607$                     | $0.006145\pm 0.001024$ | 4.1    | 0.018572             |
| Leucine                        | $0.324295\pm 0.054049$                     | $0.058134\pm 0.009689$ | 2.48   | 0.018818             |
| L-Gulonolactone                | $1.3\text{e}^{-08}\pm 2.17\text{e}^{-09}$  | $0.379241\pm 0.063207$ | -24.79 | 0.0192               |
| Creatine                       | $0.000082\pm 0.000014$                     | $0.000659\pm 0.00011$  | -3.01  | 0.020066             |

|                    |                                           |                                            |        |          |
|--------------------|-------------------------------------------|--------------------------------------------|--------|----------|
| Pipecolinic acid   | 0.019699±0.003283                         | 0.002365±0.000394                          | 3.06   | 0.020489 |
| N-Acetyltryptophan | 1.3e <sup>-08</sup> ±2.17e <sup>-09</sup> | 0.001089±0.000181                          | -16.35 | 0.02269  |
| Orotic acid        | 0.000007±1.11e <sup>-06</sup>             | 0.001216±0.000203                          | -7.51  | 0.02624  |
| Guanosine          | 0.000695±0.000116                         | 5.52e <sup>-09</sup> ±2.17e <sup>-09</sup> | 16.94  | 0.026719 |
| Ascorbate          | 1.3e <sup>-08</sup> ±2.17e <sup>-09</sup> | 0.006532±0.001089                          | -18.94 | 0.027557 |
| Glycolic acid      | 0.0486±0.0081                             | 0.010371±0.001729                          | 2.23   | 0.034815 |
| Resveratrol        | 1.3e <sup>-08</sup> ±2.17e <sup>-09</sup> | 0.000347±0.000058                          | -14.7  | 0.049734 |

---
